# Supplementary material for: The onset of the spring phytoplankton bloom in the coastal North Sea supports the Disturbance Recovery Hypothesis
Source: Copernicus journal article supplement (doi:10.5194/bg-2021-306), 2021-11-25
Supplement: Supplementary file 1 [file bg-2021-306-supplement.pdf]

# The onset of the spring phytoplankton bloom in the coastal North Sea supports the Disturbance Recovery Hypothesis

Ricardo González-Gil<sup>1\*</sup>, Neil S. Banas<sup>1</sup>, Eileen Bresnan<sup>2</sup>, Michael R. Heath<sup>1</sup>

5 <sup>1</sup>Department of Mathematics and Statistics, University of Strathclyde, 26 Richmond Street, Glasgow, G1 1XH, UK

<sup>2</sup>Marine Scotland Science, Marine Laboratory, 375 Victoria Road, Aberdeen, AB11 9DB, UK

\*Correspondence to: Ricardo González-Gil ([rgonzalezgil@gmail.com](mailto:rgonzalezgil@gmail.com))

## 1 Supplementary Notes

### 10 1.1 Supplementary Note 1: Relationship between light attenuation ( $K_d$ ) and Secchi disk depth ( $Z_{SD}$ )

From 2007 to 2011, vertical light attenuation ( $K_d$ ) profiles were weekly estimated at the Stonehaven site based on chlorophyll 'a' (Chl) and turbidity profiles sampled using a Saiv SD204 CTD (Saiv A/S Environmental Sensors & Systems) equipped with a fluorescence and an optical backscatter sensor (for further methodological details, see Heath et al., 2017). As Secchi disk depths ( $Z_{SD}$ ) were recorded weekly (Bresnan et al., 2016) during almost the entire period analyzed (2001 to 2017), we used  
15  $Z_{SD}$  to calculate  $K_d$ . For this, we estimated the relationship between log-transformed  $Z_{SD}$  and  $K_d$  averaged from 0 to 10 m depth (the layer where phytoplankton was sampled) or averaged for the entire water column (i.e., 0 to 48 m; see [Figure S1](#)). In both cases, the coefficients of the relationship were similar and relatively close to those estimated by Devlin et al. (2008) for UK coastal waters. However, the proportion of variance explained by the relationship was larger when  $K_d$  was averaged for the 0–10 m layer. This makes sense considering that  $Z_{SD}$  records depend largely on the section of the attenuation profile above  
20 them and that the calculated average  $Z_{SD}$  between 2007 and 2011 was  $6.61 \pm 1.89$  m (Mean  $\pm$  SD); between 2001 and 2017, the average  $Z_{SD}$  was similar ( $6.94 \pm 2.15$  m).

### 1.2 Supplementary Note 2: Transformation of sunshine duration records into incoming solar radiation

Daily amounts of sunshine duration recorded at the Dyce meteorological station (57° 12.3' N, 2° 12.2' W, Met Office, 2012) were transformed into total incoming solar radiation ( $W m^{-2}$ ) using the Ångström–Prescott model and site-dependent  
25 coefficients from Bojanowski et al. (2013). To estimate incoming solar radiations, we used the R packages `suncalc` v0.5.0 (Thieurmél and Elmarhraoui, 2019) and `sirad` v2.3-3 (Bojanowski, 2016).

After 2005 (a year without records), the Campbell–Stokes (C–S) recorder was replaced in 2006 by a new automatic Kipp and Zonen (KZ) sensor at Dyce, requiring a data correction to avoid any bias. Bojanowski et al. (2013) used sunshine data from

2005 to 2010, a period when all meteorological stations from eastern Scotland had KZ sensors (Legg, 2014). Thus, before  
 30 estimating the incoming solar radiations, we converted C–S records prior to 2005 into KZ sunshine durations.

To convert C–S into KZ sunshine durations, we used information recorded between 2001 and 2005 at three meteorological  
 stations of eastern Scotland (Kinloss, Aviemore, and Leuchars; see Legg, 2014 for more details). Following Legg (2014), we  
 first converted sunshine durations measured by both sensors into proportions of maximum possible sunshine hours in a day.  
 Then, we estimated the relationship between the proportions of maximum sunshine hours measured by each sensor for each  
 35 day of the year ( $dy$ ) using a generalized additive model (GAM, Hastie and Tibshirani, 1986):

$$KZ = a + te(CS, dy) + \varepsilon \quad (S1)$$

Where  $a$  represents the intercept,  $te(CS, dy)$  is an interaction term included as a 2D smooth (in particular, a tensor product)  
 that captures how the nonlinear effect of C–S sunshine proportions varies through the seasonal cycle (Wood, 2017), and  $\varepsilon$  is  
 40 the error term. The tensor product had as marginal bases a thin-plate regression spline for  $CS$  and a cyclic cubic spline for  $dy$ ,  
 with maximum effective degrees of freedom ( $edf$ ) set to 4 and 8, respectively, and optimal  $edf$  determined by restricted  
 maximum likelihood, REML (Wood, 2017). We fitted the model using the R package `mgcv` v1.8-33 (Wood, 2017) and it had  
 a  $p$ -value = 0.000 and  $R^2 = 0.961$ . Model predictions are shown in [Figure S2](#) and also per month in [Figure S3](#), for comparison  
 with Legg (2014). Between April and August, this model predicted some negative proportions of KZ sunshine durations for  
 45 the lowest C–S proportions (although never below -0.004). As negative proportions cannot occur, we set them to zero. Finally,  
 KZ estimated proportions were converted back into hours of sunshine duration per day.

### 1.3 Supplementary Note 3: Estimation of surface and attenuated Photosynthetic Active Radiation (PAR)

To obtain daily amounts of PAR arriving to the water surface ( $PAR_{Sfc}$ ), estimations of total incoming radiation ( $W\ m^{-2}$ ) were  
 multiplied by 0.43 (Baker and Frouin, 1987). To generate daily  $K_d$  for the 0–10 m layer ( $K_{d,10}$ ) or for the entire water column  
 50 ( $K_{d,48}$ ), we linearly interpolated  $Z_{SD}$  between sampling dates before applying the linear models shown in [Figure S1](#). Using daily  
 estimations of  $PAR_{Sfc}$  and  $K_d$ , we calculated average attenuated PAR ( $PAR_{Att}$ ) as:

$$PAR_{Att,z} = \frac{\int_0^z PAR_{Sfc} e^{-K_{d,z} z} dz}{z} \quad (S2)$$

where  $z$  is the depth of the layer for which  $PAR_{Att}$  was estimated (in our case 10 or 48 m). Finally,  $PAR_{Sfc}$  and  $PAR_{Att}$  estimated for both the 0–10 m layer ( $PAR_{Att,10}$ ) and the entire water column ( $PAR_{Att,48}$ ) were converted from  $W\ m^{-2}$  to  $\mu mol\ m^{-2}\ s^{-1}$  using a conversion factor of  $0.217\ W\ m^{-2} = 1\ \mu mol\ m^{-2}\ s^{-1}$  (Carruthers et al., 2001).

#### 1.4 Supplementary Note 4: Phytoplankton carbon (C) biomass calculations using microscopy and flow cytometry counts

To calculate phytoplankton C biomass concentrations ( $mg\ C\ m^{-3}$ ) based on microscopic observations (2000–2017), we estimated the cell carbon content ( $C_c$ ,  $pg\ C\ cell^{-1}$ ) of the different phytoplankton taxa identified. For this, we collected cell volume information ( $V_c$ ,  $\mu m^{-3}$ ) from the literature (Table S1). Due to limitations in cell identification using a light microscope at x200 magnification, only diatom and dinoflagellate taxa with a mean cell diameter generally  $> 10\ \mu m$  (Table S1) were extensively characterized and thus, we only gathered information for these groups.

Following Harrison et al. (2015), prior to statistical calculations, we transformed individual  $V_c$  to equivalent spherical diameter (ESD) using the below Eq. S3, as ESD shows a more normal distribution than  $V_c$ :

$$ESD = 2 \left( \frac{3 V_c}{4 \pi} \right)^{\frac{1}{3}} \quad (S3)$$

Then, after converting mean ESD to mean  $V_c$  using the reverse form of Eq. S3, we estimated mean  $C_c$  using the equation  $C_c = aV_c^b$ , where  $a$  and  $b$  are respectively 0.288 and 0.811 for diatoms, and 0.216 and 0.939 for non-diatom (Menden-Deuer and Lessard, 2000).

Finally, we estimated the C biomass for diatom and dinoflagellate taxa with a mean cell diameter usually  $> 10\ \mu m$  ( $C_{diatom+dinoflagellate > 10\mu m}$ ). For this, we summed the observed cell abundance ( $n$ ) multiplied by the corresponding  $C_c$  for all taxonomic entities ( $N$ ):

$$C_{diatom+dinoflagellate > 10\mu m} = \sum_{i=1}^N n_i \cdot C_c \quad (S4)$$

As the detection limit for microscopic phytoplankton counts was around  $1 \times 10^6$  cells  $\text{m}^{-3}$ , there were several zero-abundance records and, consequently, several  $C_{\text{diatom+dinoflagellate} > 10\mu\text{m}} = 0 \text{ mg C m}^{-3}$ . To correct this, in those dates when zero-abundance records of diatoms or dinoflagellates were registered, we replaced zero-biomass concentrations for each class by half of their minimum biomass estimated throughout the entire time-series (i.e., half of the minimum  $C_{\text{diatom} > 10\mu\text{m}} > 0 \text{ mg C m}^{-3}$  or  $C_{\text{dinoflagellate} > 10\mu\text{m}} > 0 \text{ mg C m}^{-3}$ ).

To calculate C biomass concentrations ( $\text{mg C m}^{-3}$ ) using flow cytometer counts (2015–2017), we followed a similar procedure as the one used for microscope observations. In this case, to estimate for a particular date the C biomass of the different phytoplankton groups identified (which ESD rarely exceeded  $10 \mu\text{m}$ ), we multiplied their abundance by their representative cell carbon content ( $C_c$ ,  $\text{pg C cell}^{-1}$ ) extracted from the literature ([Table S2](#)).

## 1.5 Supplementary Note 5: Estimation of C biomass for the entire phytoplankton community ( $C_{\text{phyto}}$ ) based on a C:Chl seasonality

Although Chl is extensively used as a proxy of phytoplankton biomass, changes in the concentration of this pigment are also driven by physiological adaptations to the environment (e.g., nutrient concentration and light availability). Thus, it is recommended to use carbon (C) phytoplankton biomass instead (Behrenfeld and Boss, 2018).

We could estimate C biomass of the entire phytoplankton community ( $C_{\text{phyto}}$ ,  $\text{mg C m}^{-3}$ ) using only cell counts from microscopic analysis and cell C contents based on size information from the literature (Supplementary Note 4 and [Table S1](#)). However, these estimations present some limitations compared to the use of Chl concentration as a proxy for phytoplankton biomass: 1) species counts at x200 magnification are only available since 2000 (Bresnan et al., 2016); 2) while Chl concentrations depend on phytoplankton encompassing all groups and sizes, only diatom and dinoflagellate taxa with average cell sizes generally  $> 10 \mu\text{m}$  ([Table S1](#)) were extensively characterized at the microscope due to limitations in cell identification at x200 magnification; 3) The detection limit for microscopic phytoplankton counts was around  $1 \times 10^6$  cells  $\text{m}^{-3}$ , leading to several zero-abundance records for all taxa, especially in winter (although see supplementary Note 4); 4) using average cell sizes from the literature rather than in situ size measures might lead to less accurate C biomass estimations for a particular sampling date.

Alternatively, the use of flow cytometry counts and cell C contents from the literature to estimate  $C_{\text{phyto}}$  (Supplementary Note 4 and [Table S2](#)) would also present several issues. For instance, these data are only available since 2015 and phytoplankton cells counted with the flow cytometry rarely exceeded  $10 \mu\text{m}$ .

Considering all the above, we decided to transform Chl concentrations into  $C_{\text{phyto}}$  using an average seasonality of C:Chl ratios estimated by combining the available information. However, for this estimation, we excluded 2017 as this year has several long data gaps and showed an unusually large *Phaeocystis* spp. bloom in October–December compared to the other years ([Figure S4](#) and Figure 3 in the main text).

To estimate the average seasonal cycle of the C:Chl ratio at the Stonehaven monitoring site, we followed several steps. First, we estimated total C biomass of large ( $> 10 \mu\text{m}$ ) diatoms and dinoflagellates ( $C_{\text{diatom+dinoflagellate} > 10 \mu\text{m}}$ ) based on microscopic analysis and, since 2015, C biomass for the whole phytoplankton community ( $C_{\text{phyto}}$ ) by adding  $C_{\text{diatom+dinoflagellate} > 10 \mu\text{m}}$  to the C biomass of all the groups identified with the flow cytometer (Supplementary Note 4). Although some overlap might exist between the cell size ranges of the phytoplankton identified using the microscope and flow cytometer, we expect this to be small. Then, for 2015–2016, a model comparison showed that the same seasonal curve should be applied to the  $C_{\text{diatom+dinoflagellate} > 10 \mu\text{m}}:\text{Chl}$  and  $C_{\text{phyto}}:\text{Chl}$  ratios, with a difference of 23.747 in their intercepts (model 2 in [Table S3](#) and [Figure S4a](#)). Finally, assuming that the difference in the intercept remains more or less constant among years and using data from 2000 to 2016, we fitted a seasonal curve to the  $C_{\text{diatom+dinoflagellate}}:\text{Chl}$  ratios and added 23.747 to obtain the average seasonality of  $C_{\text{phyto}}:\text{Chl}$  ([Figure S4b](#)). The shape of the seasonal curve is similar to the one described in Jakobsen and Markager (2016) for another coastal area of the North Sea, although our estimations are higher probably because we also accounted for the biomass of the small size ( $< 10 \mu\text{m}$ ) phytoplankton.

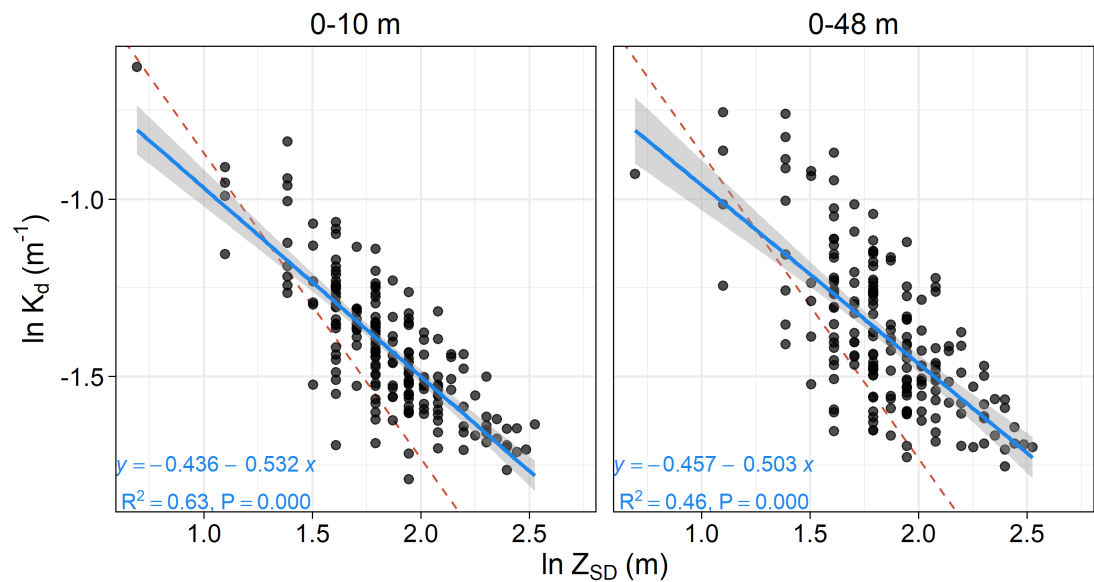

**Figure S1.** Relationship between log-transformed light attenuation coefficient ( $K_d$ ) and Secchi disk depth ( $Z_{SD}$ ). To estimate  $K_d$ , attenuation profiles (2007–2011) were averaged between the surface and 10 m depth (left panel) or for the entire water column (right panel). The shaded area represents the 95% confidence interval associated with the estimated linear correlation (blue line). The equation, proportion of variance explained ( $R^2$ ), and p-value ( $P$ ) of the relationships are shown. Additionally, the linear relationship estimated by Devlin et al. (2008) for UK coastal waters is also included (red dashed line).

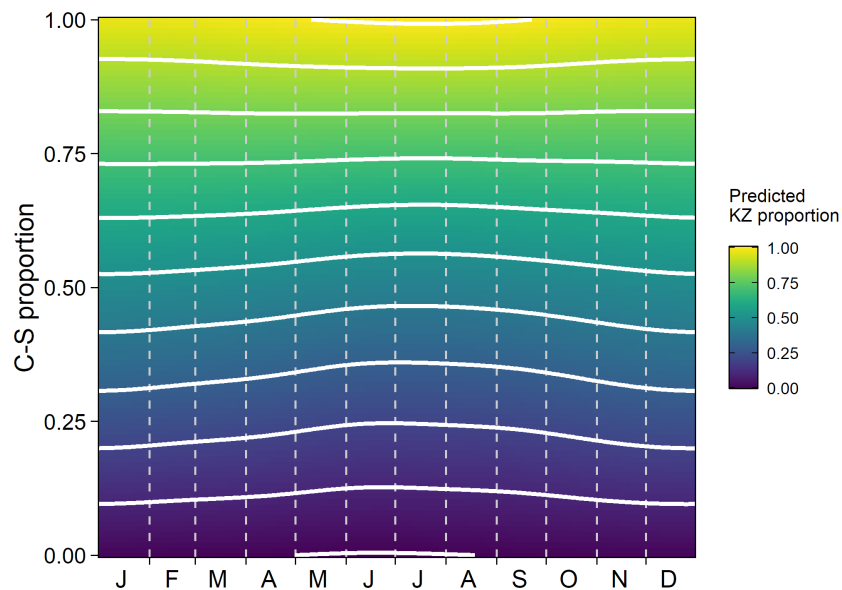

**Figure S2.** Predicted proportion of maximum possible sunshine-hours in a day measured by the automatic Kipp and Zonen (KZ) between 2001 and 2005 at three meteorological stations of eastern Scotland (Kinloss, Aviemore, Leuchars, see Legg, 2014 for more details). Predicted values were obtained using a generalized additive model (GAM) that included an interaction between the maximum possible sunshine-hours in a day measured by the Campbell–Stokes (C–S) and day of year (see [Eq. S1](#)).

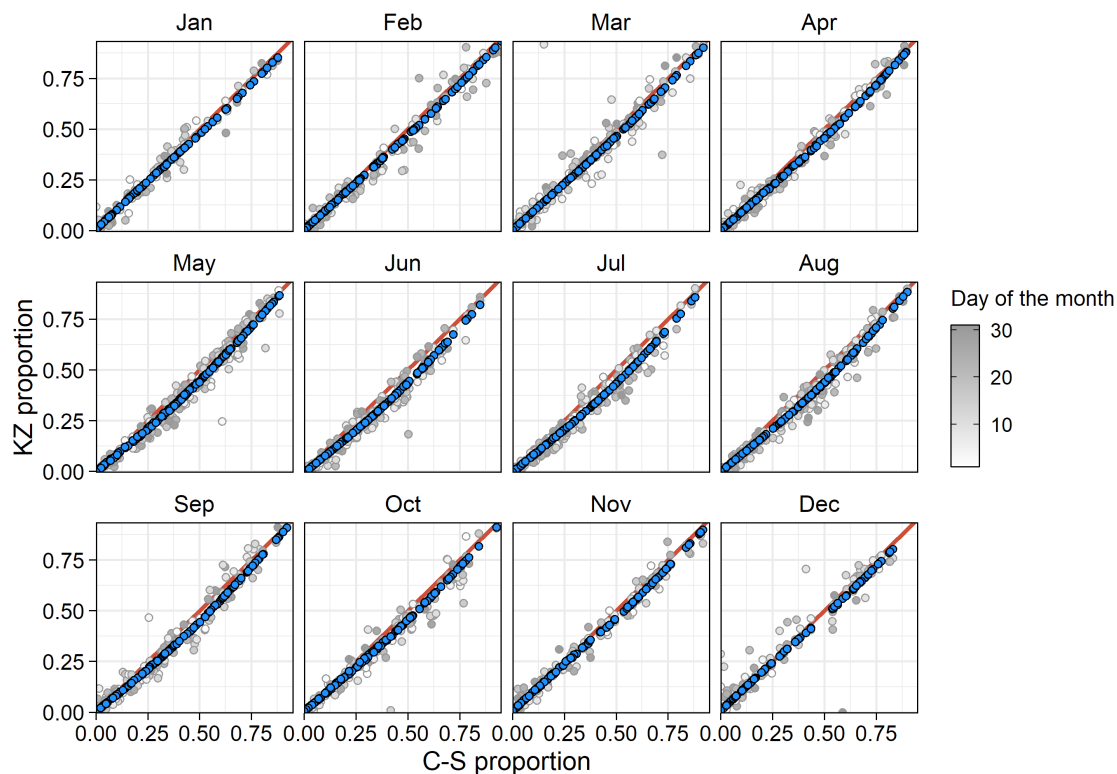

**Figure S3.** Relationship between maximum possible sunshine-hours in a day measured by the automatic Kipp and Zonen (KZ) and Campbell–Stokes (C–S) sensors for each month (grey filled dots). Records were made between 2001 and 2005 at three meteorological stations of eastern Scotland (Kinloss, Aviemore, Leuchars, see Legg, 2014 for more details). Blue dots correspond to the predicted maximum possible sunshine-hours in a day measured by the automatic Kipp and Zonen (KZ) shown in [Figure S2](#) (see [Eq. S1](#)). We also show in red the 1:1 line for reference.



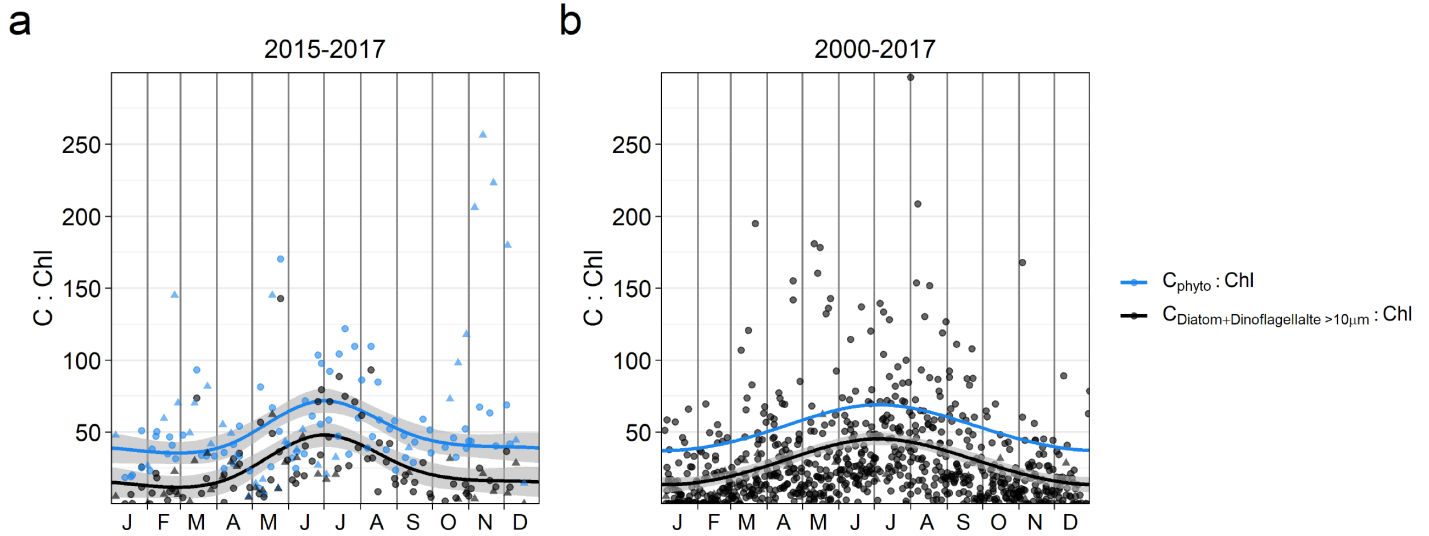

**Figure S4.** (a) C:Chl ratios (2015–2017) calculated using C biomass for the whole phytoplankton community ( $C_{\text{phyto}}$ , blue symbols) or C biomass of large ( $> 10 \mu\text{m}$ ) diatoms and dinoflagellates ( $C_{\text{diatom+dinoflagellate} > 10\mu\text{m}}$ , black symbols). Lines represent the estimated seasonality (2015–2016) based on the best generalized additive model (GAM) from [Table S3](#), although fitted using restricted maximum likelihood, REML. (b) C:Chl ratios (2000–2017) calculated using C biomass of large ( $> 10 \mu\text{m}$ ) diatoms and dinoflagellates ( $C_{\text{diatom+dinoflagellate} > 10\mu\text{m}}$ , black symbols). The black line represents the estimated seasonality (2000–2016) based on the first GAM in [Table S3](#), although fitted using REML. The blue line results from adding 23.747 to this seasonality, which is the difference in the intercept between the two curves shown in (a). In (a) and (b), triangles correspond to 2017 and dots to the rest of the years, and shaded areas denote the 95% confidence interval associated to the estimated seasonalities.

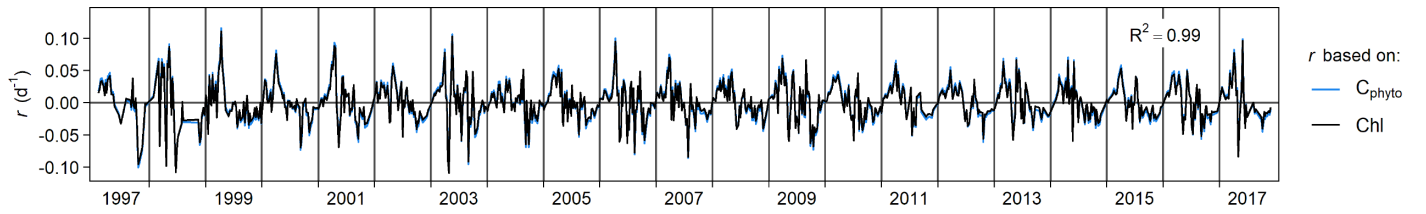

**Figure S5.** Changes through time in phytoplankton biomass accumulation rates ( $r$ , see Methods in the main text) based on estimated C biomass concentrations for the whole phytoplankton community ( $C_{\text{phyto}}$ , blue line) and based on Chl concentrations (black line). The proportion of variance explained ( $R^2$ ) by the linear relationship between the two time series is also shown.

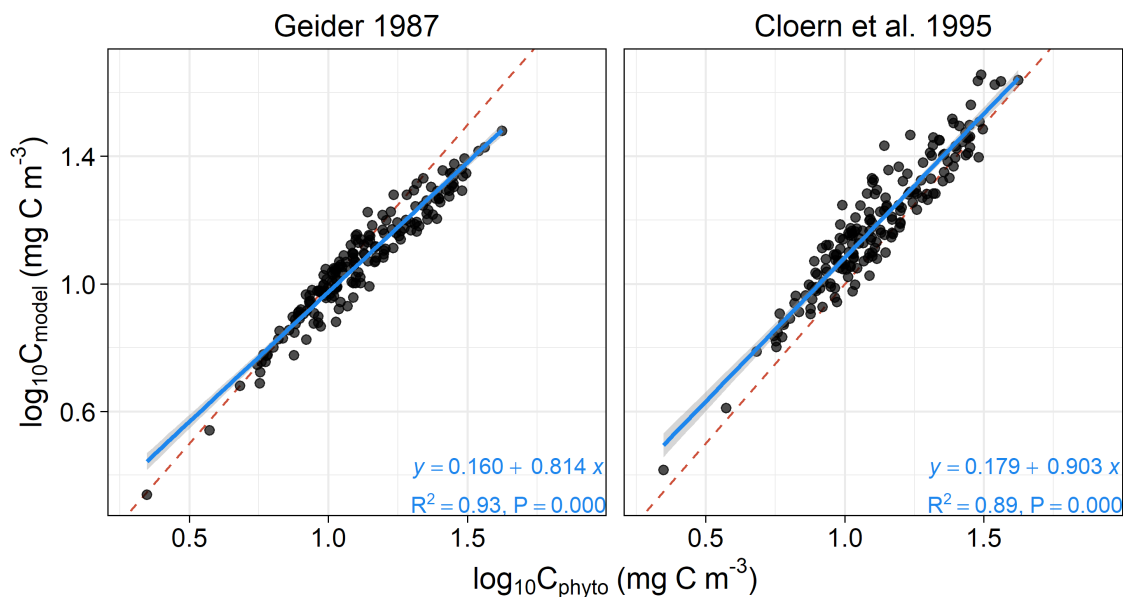

**Figure S6.** Relationship between log-transformed phytoplankton C biomass concentrations in winter (60 days before and after the winter solstice) estimated using two published C:Chl models,  $C_{\text{model}}$  (left panel, Geider, 1987; right panel, Cloern et al., 1995), and using the fixed C:Chl seasonality from this study,  $C_{\text{phyto}}$  (see Supplementary Note 5). To calculate C:Chl ratios, models are fed with estimated average attenuated Photosynthetic Active Radiations (PAR) for the whole water column (i.e., 0–48 m depth) and with temperature averaged between surface and bottom layers. The shaded area represents the 95% confidence interval associated with the estimated linear correlation (blue line). The equation, proportion of variance explained ( $R^2$ ), and p-value ( $P$ ) of the relationships are shown. We also show the 1:1 relationship (red dashed lines) for comparison.

3      **Supplementary Tables**

130  
  
135

**Table S1.** Cell volume ( $V_c$ ;  $\mu\text{m}^3$ ) and equivalent spherical diameter (ESD;  $\mu\text{m}$ ) information for the 85 species, 44 genera and 2 classes identified using a light microscope at 200X magnification.  $V_c$  was transformed into cell carbon content ( $C_c$ ;  $\text{pg C cell}^{-1}$ ) following Menden-Deuer and Lessard (2000) recommendations. The number of species aggregated for statistical calculations at genus or class level is indicated ( $N_{\text{species}}$ ); NA denotes that the exact  $N_{\text{species}}$  was not available. For some species, only information at genus level was available and, in those cases, the  $N_{\text{species}}$  is shown. (a) Information from Harrison et al. (2015), hrr15; from Olenina et al. (2006), ol06; and from Leblanc et al. (2012), leb12. For all of these sources, minimum-maximum  $V_c$  were available. However, in the case of Leblanc et al. (2012), mean  $V_c$  corresponds to the mean of minimum-maximum  $V_c$  and therefore, no coefficient of variation (CV) is reported. Additionally, when Olenina et al. (2006) was the source, the number of individual cells used for calculations is shown (n). In general, we chose Harrison et al. (2015) over the other potential sources as the information given in this publication is based on several data sets from coastal areas. (b) For these species, only length information of cell axes ( $\mu\text{m}$ ) was available. Using this information and selected cell shape formulas from Olenina et al. (2006), we calculated  $V_c$ . Only for Nézan et al. (2012) and Gómez et al. (2016) minimum-maximum  $V_c$  were calculated and, in these cases, mean  $V_c$  is also reported.

**Table S1a**

| Taxonomic level   | name                               | $N_{\text{species}}$ | n  | Mean ESD | $V_c$ min-max | Mean $V_c$ (CV%) | Mean $C_c$ | Comments | Source |
|-------------------|------------------------------------|----------------------|----|----------|---------------|------------------|------------|----------|--------|
| Species           |                                    |                      |    |          |               |                  |            |          |        |
| Bacillariophyceae |                                    |                      |    |          |               |                  |            |          |        |
|                   | <i>Achnanthes longipes</i>         | NA                   | 15 | 10.72    | 150-2750      | 645 (26.9)       | 54.7       |          | ol06   |
|                   | <i>Asterionellopsis glacialis</i>  |                      |    | 11.50    | 94-11300      | 797 (49.0)       | 64.9       |          | hrr15  |
|                   | <i>Cerataulina pelagica</i>        |                      |    | 31.33    | 2840-102000   | 16100 (39.0)     | 743.2      |          | hrr15  |
|                   | <i>Chaetoceros danicus</i>         |                      |    | 13.75    | 113-5080      | 1360 (33.0)      | 100.2      |          | hrr15  |
|                   | <i>Chaetoceros socialis</i>        |                      |    | 8.79     | 33-3150       | 356 (45.0)       | 33.8       |          | hrr15  |
|                   | <i>Corethron hystrix</i>           |                      |    | 57.78    | 2470-1420000  | 101000 (78.0)    | 3295.3     |          | hrr15  |
|                   | <i>Cylindrotheca closterium</i>    |                      |    | 9.33     | 10-5230       | 425 (54.0)       | 39.0       |          | hrr15  |
|                   | <i>Dactyliosolen fragilissimus</i> |                      |    | 25.12    | 1680-143000   | 8300 (48.0)      | 434.3      |          | hrr15  |
|                   | <i>Detonula confervacea</i>        |                      |    | 12.08    | 498-2140      | 922 (19.0)       | 73.1       |          | hrr15  |
|                   | <i>Detonula pumila</i>             |                      |    | 28.48    | 2360-43700    | 12100 (28.0)     | 589.6      |          | hrr15  |
|                   | <i>Ditylum brightwellii</i>        |                      |    | 51.95    | 28100-274000  | 73400 (22.0)     | 2543.7     |          | hrr15  |
|                   | <i>Eucampia zodiacus</i>           |                      |    | 25.95    | 737-31800     | 9150 (28.0)      | 470.0      |          | hrr15  |

| Taxonomic level    | name                                | N <sub>species</sub> | n | Mean ESD | V <sub>c</sub> min-max | Mean V <sub>c</sub> (CV%) | Mean C <sub>c</sub> | Comments | Source |
|--------------------|-------------------------------------|----------------------|---|----------|------------------------|---------------------------|---------------------|----------|--------|
|                    | <i>Guinardia delicatula</i>         |                      |   | 22.51    | 831-26600              | 5970 (30.0)               | 332.4               |          | hrr15  |
|                    | <i>Guinardia flaccida</i>           |                      |   | 63.49    | 16600-349000           | 134000 (26.0)             | 4144.5              |          | hrr15  |
|                    | <i>Guinardia striata</i>            |                      |   | 40.85    | 2770-201000            | 35700 (35.0)              | 1417.8              |          | hrr15  |
|                    | <i>Leptocylindrus danicus</i>       |                      |   | 16.45    | 95-10400               | 2330 (30.0)               | 155.0               |          | hrr15  |
|                    | <i>Leptocylindrus mediterraneus</i> |                      |   | 26.91    | 382-68200              | 10200 (51.0)              | 513.3               |          | hrr15  |
|                    | <i>Leptocylindrus minimus</i>       |                      |   | 8.41     | 10-3380                | 312 (53.0)                | 30.3                |          | hrr15  |
|                    | <i>Meuniera membranacea</i>         |                      |   | 50.12    | 18850-159043           | 65923                     | 2331.5              |          | leb12  |
|                    | <i>Nitzschia longissima</i>         |                      |   | 10.46    | 24-15400               | 599 (63.0)                | 51.5                |          | hrr15  |
|                    | <i>Paralia sulcata</i>              |                      |   | 23.65    | 1150-68000             | 6930 (43.0)               | 375.2               |          | hrr15  |
|                    | <i>Proboscia alata</i>              |                      |   | 34.50    | 281-306000             | 21500 (55.0)              | 939.7               |          | hrr15  |
|                    | <i>Proboscia indica</i>             | 1                    |   | 34.50    | 281-306000             | 21500 (55.0)              | 939.7               |          | hrr15  |
|                    | <i>Rhizosolenia hebetata</i>        |                      |   | 47.78    | 439-188000             | 57100 (46.0)              | 2075.0              |          | hrr15  |
|                    | <i>Rhizosolenia imbricata</i>       |                      |   | 54.12    | 1360-1560000           | 83000 (67.0)              | 2810.4              |          | hrr15  |
|                    | <i>Rhizosolenia setigera</i>        |                      |   | 32.52    | 1480-150000            | 18000 (44.0)              | 813.6               |          | hrr15  |
|                    | <i>Rhizosolenia styliformis</i>     |                      |   | 69.53    | 18900-1290000          | 176000 (48.0)             | 5170.2              |          | hrr15  |
|                    | <i>Stephanopyxis turris</i>         |                      |   | 32.58    | 6840-47700             | 18100 (22.0)              | 817.3               |          | hrr15  |
|                    | <i>Striatella unipunctata</i>       |                      |   | 52.40    | 5773-294524            | 75345                     | 2598.3              |          | leb12  |
|                    | <i>Thalassionema nitzschioides</i>  |                      |   | 13.33    | 50-143000              | 1240 (80.0)               | 92.9                |          | hrr15  |
|                    | <i>Thalassiosira nordenskiöldii</i> |                      |   | 30.87    | 193-499000             | 15400 (79.0)              | 716.9               |          | hrr15  |
|                    | <i>Thalassiosira rotula</i>         |                      |   | 28.40    | 3450-47000             | 12000 (25.0)              | 585.6               |          | hrr15  |
| <b>Dinophyceae</b> |                                     |                      |   |          |                        |                           |                     |          |        |

| Taxonomic level | name                             | N <sub>species</sub> | n  | Mean ESD | V <sub>c</sub> min-max | Mean V <sub>c</sub> (CV%) | Mean C <sub>c</sub> | Comments                                                                                                                       | Source |
|-----------------|----------------------------------|----------------------|----|----------|------------------------|---------------------------|---------------------|--------------------------------------------------------------------------------------------------------------------------------|--------|
|                 | <i>Amphidinium crassum</i>       | NA                   | 16 | 16.69    | 92-19852               | 2434 (46.1)               | 326.7               |                                                                                                                                | ol06   |
|                 | <i>Amphidinium sphenoides</i>    | NA                   | 16 | 16.69    | 92-19852               | 2434 (46.1)               | 326.7               |                                                                                                                                | ol06   |
|                 | <i>Amylax triacantha</i>         |                      |    | 27.51    | 4600-16800             | 10900 (13.0)              | 1335.4              |                                                                                                                                | hrr15  |
|                 | <i>Archaeoperidinium minutum</i> |                      |    | 30.25    | 25-41600               | 14500 (40.0)              | 1745.7              |                                                                                                                                | hrr15  |
|                 | <i>Dinophysis acuminata</i>      |                      |    | 27.25    | 1670-40700             | 10600 (26.0)              | 1300.8              |                                                                                                                                | hrr15  |
|                 | <i>Dinophysis acuta</i>          |                      |    | 43.73    | 1580-105000            | 43800 (29.0)              | 4929.4              |                                                                                                                                | hrr15  |
|                 | <i>Dinophysis dens</i>           | 5                    |    | 43.13    | 10700-54400            | 42000 (7.7)               | 4739.0              |                                                                                                                                | hrr15  |
|                 | <i>Gonyaulax digitalis</i>       |                      |    | 32.27    | 2950-43400             | 17600 (21.0)              | 2094.1              |                                                                                                                                | hrr15  |
|                 | <i>Gonyaulax spinifera</i>       |                      |    | 31.33    | 10700-23800            | 16100 (9.0)               | 1926.0              |                                                                                                                                | hrr15  |
|                 | <i>Gonyaulax verior</i>          |                      |    | 28.33    | 7120-39300             | 11900 (23.0)              | 1450.1              |                                                                                                                                | hrr15  |
|                 | <i>Gyrodinium fusiforme</i>      |                      |    | 32.58    | 3520-109000            | 18100 (35.0)              | 2149.9              |                                                                                                                                | hrr15  |
|                 | <i>Gyrodinium lachryma</i>       | NA                   | 30 | 35.10    | 72-177606              | 22637 (43.3)              | 2652.4              |                                                                                                                                | ol06   |
|                 | <i>Gyrodinium spirale</i>        |                      |    | 36.61    | 3160-113000            | 25700 (38.0)              | 2988.0              |                                                                                                                                | hrr15  |
|                 | <i>Heterocapsa niei</i>          | NA                   | 18 | 11.45    | 103-4179               | 785 (40.7)                | 113.0               |                                                                                                                                | ol06   |
|                 | <i>Heterocapsa triquetra</i>     |                      |    | 16.75    | 965-5700               | 2460 (16.0)               | 330.0               |                                                                                                                                | hrr15  |
|                 | <i>Karenia mikimotoi</i>         | NA                   | 35 | 29.14    | 72-177606              | 12958 (64.2)              | 1570.8              | It belongs to the order Gymnodiniales. Thus, we used information for <i>Gymnodinium</i> spp., which have a similar cell shape. | ol06   |
|                 | <i>Katodinium glaucum</i>        |                      |    | 17.19    | 416-18300              | 2660 (38.0)               | 355.2               |                                                                                                                                | hrr15  |
|                 | <i>Oxyrrhis marina</i>           |                      |    | 15.81    | 268-6370               | 2070 (34.0)               | 280.6               |                                                                                                                                | hrr15  |
|                 | <i>Oxytoxum gracilis</i>         | 1                    |    | 7.81     | 78-476                 | 249 (20.0)                | 38.4                |                                                                                                                                | hrr15  |

| Taxonomic level | name                               | Nspecies | n | Mean ESD | V <sub>c</sub> min-max | Mean V <sub>c</sub> (CV%) | Mean C <sub>c</sub> | Comments | Source |
|-----------------|------------------------------------|----------|---|----------|------------------------|---------------------------|---------------------|----------|--------|
|                 | <i>Pentapharsodinium dalei</i>     |          | 3 | 14.02    | 497-3454               | 1443 (32.0)               | 200.0               |          | ol06   |
|                 | <i>Phalacroma oxytoxoides</i>      | 1        |   | 32.15    | 499-116000             | 17400 (41.0)              | 2071.7              |          | hrr15  |
|                 | <i>Phalacroma rotundatum</i>       |          |   | 32.15    | 499-116000             | 17400 (41.0)              | 2071.7              |          | hrr15  |
|                 | <i>Polykrikos schwartzii</i>       |          |   | 64.27    | 27300-293000           | 139000 (28.0)             | 14579.6             |          | hrr15  |
|                 | <i>Prorocentrum compressum</i>     | 5        |   | 13.37    | 905-9740               | 1250 (6.3)                | 174.8               |          | hrr15  |
|                 | <i>Prorocentrum micans</i>         |          |   | 23.92    | 71-18600               | 7170 (31.0)               | 901.1               |          | hrr15  |
|                 | <i>Prorocentrum minimum</i>        | 5        |   | 13.37    | 905-9740               | 1250 (6.3)                | 174.8               |          | hrr15  |
|                 | <i>Protoceratium reticulatum</i>   |          |   | 31.20    | 7450-31300             | 15900 (15.0)              | 1903.6              |          | hrr15  |
|                 | <i>Protoperidinium bipes</i>       |          |   | 16.06    | 432-3650               | 2170 (18.0)               | 293.4               |          | hrr15  |
|                 | <i>Protoperidinium brevipes</i>    |          |   | 26.82    | 5450-14900             | 10100 (12.0)              | 1243.1              |          | hrr15  |
|                 | <i>Protoperidinium cerasus</i>     | 17       |   | 51.38    | 11400-455000           | 71000 (17.0)              | 7758.6              |          | hrr15  |
|                 | <i>Protoperidinium conicoides</i>  |          |   | 43.83    | 10700-103000           | 44100 (25.0)              | 4961.1              |          | hrr15  |
|                 | <i>Protoperidinium conicum</i>     |          |   | 57.47    | 6060-345000            | 99400 (28.0)              | 10641.4             |          | hrr15  |
|                 | <i>Protoperidinium crassipes</i>   |          |   | 73.39    | 81300-606000           | 207000 (29.0)             | 21190.9             |          | hrr15  |
|                 | <i>Protoperidinium curtipes</i>    | 17       |   | 51.38    | 11400-455000           | 71000 (17.0)              | 7758.6              |          | hrr15  |
|                 | <i>Protoperidinium depressum</i>   |          |   | 89.63    | 21900-1330000          | 377000 (29.0)             | 37208.2             |          | hrr15  |
|                 | <i>Protoperidinium excentricum</i> | 17       |   | 51.38    | 11400-455000           | 71000 (17.0)              | 7758.6              |          | hrr15  |
|                 | <i>Protoperidinium mite</i>        | 17       |   | 51.38    | 11400-455000           | 71000 (17.0)              | 7758.6              |          | hrr15  |
|                 | <i>Protoperidinium ovatum</i>      | 17       |   | 51.38    | 11400-455000           | 71000 (17.0)              | 7758.6              |          | hrr15  |
|                 | <i>Protoperidinium pallidum</i>    |          |   | 51.38    | 2620-244000            | 71000 (33.0)              | 7758.6              |          | hrr15  |
|                 | <i>Protoperidinium pellucidum</i>  |          |   | 38.42    | 6800-78800             | 29700 (22.0)              | 3422.7              |          | hrr15  |
|                 | <i>Protoperidinium steinii</i>     |          |   | 33.45    | 9160-58900             | 19600 (21.0)              | 2316.8              |          | hrr15  |

| Taxonomic level | name                            | N <sub>species</sub> | n | Mean ESD | V <sub>c</sub> min-max | Mean V <sub>c</sub> (CV%) | Mean C <sub>c</sub> | Comments                                                                         | Source |
|-----------------|---------------------------------|----------------------|---|----------|------------------------|---------------------------|---------------------|----------------------------------------------------------------------------------|--------|
|                 | <i>Protoperidinium subinerm</i> | 17                   |   | 51.38    | 11400-455000           | 71000 (17.0)              | 7758.6              |                                                                                  | hrr15  |
|                 | <i>Pyrophacus horologium</i>    |                      |   | 43.70    | 8890-182000            | 43700 (39.0)              | 4918.9              |                                                                                  | hrr15  |
|                 | <i>Scrippsiella trochoidea</i>  |                      |   | 20.83    | 690-16800              | 4730 (28.0)               | 609.7               |                                                                                  | hrr15  |
|                 | <i>Torodinium robustum</i>      |                      |   | 18.86    | 1770-10600             | 3510 (19.0)               | 460.8               |                                                                                  | hrr15  |
|                 | <i>Tripos furca</i>             |                      |   | 44.84    | 3000-123000            | 47200 (26.0)              | 5287.9              |                                                                                  | hrr15  |
|                 | <i>Tripos fusus</i>             |                      |   | 38.34    | 6260-283000            | 29500 (40.0)              | 3401.1              |                                                                                  | hrr15  |
|                 | <i>Tripos horridus</i>          | 9                    |   | 42.82    | 13700-70700            | 41100 (7.6)               | 4643.6              |                                                                                  | hrr15  |
|                 | <i>Tripos lineatus</i>          |                      |   | 29.76    | 1110-96300             | 13800 (32.0)              | 1666.5              |                                                                                  | hrr15  |
|                 | <i>Tripos minutum</i>           | 9                    |   | 42.82    | 13700-70700            | 41100 (7.6)               | 4643.6              |                                                                                  | hrr15  |
|                 | <i>Tripos muelleri</i>          |                      |   | 49.42    | 414-814000             | 63200 (54.0)              | 6955.5              |                                                                                  | hrr15  |
| <b>Genus</b>    |                                 |                      |   |          |                        |                           |                     |                                                                                  |        |
|                 | <b>Bacillariophyceae</b>        |                      |   |          |                        |                           |                     |                                                                                  |        |
|                 | <i>Asterionella</i>             | 3                    |   | 14.28    | 235-4783               | 1525                      | 109.9               |                                                                                  | leb12  |
|                 | <i>Bacteriastrum</i>            | 1                    |   | 28.64    | 1560-41000             | 12300 (38.0)              | 597.5               | Information for <i>B. hyalinum</i> , present in the North Sea (Hoppenrath, 2004) | hrr15  |
|                 | <i>Bellerochea</i>              | 1                    |   | 42.04    | 1360-523000            | 38900 (77.0)              | 1520.0              |                                                                                  | hrr15  |
|                 | <i>Biddulphia</i>               | 1                    |   | 58.53    | 7790-440000            | 105000 (49.0)             | 3400.8              |                                                                                  | hrr15  |
|                 | <i>Cerataulina</i>              | 1                    |   | 31.33    | 2840-102000            | 16100 (39.0)              | 743.2               |                                                                                  | hrr15  |
|                 | <i>Chaetoceros</i>              | 35                   |   | 17.40    | 25-13200               | 2760 (6.7)                | 177.8               |                                                                                  | hrr15  |
|                 | <i>Coscinodiscus</i>            | 7                    |   | 123.66   | 4380-5580000           | 990000 (75.0)             | 20982.3             |                                                                                  | hrr15  |
|                 | <i>Detonula</i>                 | NA                   |   | 40.38    | 424-190852             | 34468                     | 1378.0              |                                                                                  | leb12  |



| Taxonomic level    | name                         | N <sub>species</sub> | n  | Mean ESD | V <sub>c</sub> min-max | Mean V <sub>c</sub> (CV%) | Mean C <sub>c</sub> | Comments                                | Source |
|--------------------|------------------------------|----------------------|----|----------|------------------------|---------------------------|---------------------|-----------------------------------------|--------|
|                    | <i>Eucampia</i>              | 1                    |    | 25.95    | 737-31800              | 9150 (28.0)               | 470.0               |                                         | hrr15  |
|                    | <i>Fragilaria</i>            | NA                   | 13 | 10.24    | 69-1581                | 563 (27.0)                | 49.0                |                                         | ol06   |
|                    | <i>Guinardia</i>             | 3                    |    | 40.85    | 4580-163000            | 35700 (24.0)              | 1417.8              |                                         | hrr15  |
|                    | <i>Gyrosigma/Pleurosigma</i> | 6                    | 15 | 40.77    | 2457-211680            | 35472 (45.2)              | 1410.4              |                                         | ol06   |
|                    | <i>Lauderia</i>              | 1                    |    | 37.27    | 13500-137000           | 27100 (24.0)              | 1133.8              |                                         | hrr15  |
|                    | <i>Licmophora</i>            | NA                   |    | 14.77    | 101-7020               | 1688                      | 119.3               |                                         | leb12  |
|                    | <i>Melosira</i>              | 3                    |    | 26.99    | 4580-22800             | 10300 (7.9)               | 517.4               |                                         | hrr15  |
|                    | <i>Nitzschia</i>             | NA                   | 20 | 13.48    | 45-29160               | 1282 (58.7)               | 95.5                |                                         | ol06   |
|                    | <i>Odontella</i>             | 1                    |    | 33.79    | 919-148000             | 20200 (48.0)              | 893.4               |                                         | hrr15  |
|                    | <i>Pseudo-nitzschia</i>      | 3                    |    | 12.92    | 200-1290               | 1130 (3.5)                | 86.2                |                                         | hrr15  |
|                    | <i>Rhaphoneis</i>            | 1                    |    | 28.72    | 3240-31250             | 12403                     | 601.5               |                                         | leb12  |
|                    | <i>Rhizosolenia</i>          | 4                    |    | 50.96    | 10800-111000           | 69300 (14.0)              | 2427.9              |                                         | hrr15  |
|                    | <i>Skeletonema</i>           | 1                    |    | 8.97     | 50-1810                | 378 (35.0)                | 35.5                |                                         | hrr15  |
|                    | <i>Thalassionema</i>         | 1                    |    | 13.33    | 50-143000              | 1240 (80.0)               | 92.9                | Information for <i>T. nitzschioides</i> | hrr15  |
|                    | <i>Thalassiosira</i>         | 10                   |    | 29.97    | 54-87100               | 14100 (15.0)              | 667.4               |                                         | hrr15  |
|                    | <i>Triceratium</i>           | NA                   |    | 82.12    | 64-2116273             | 289990                    | 7751.5              |                                         | leb12  |
| <b>Dinophyceae</b> |                              |                      |    |          |                        |                           |                     |                                         |        |
|                    | <i>Alexandrium</i>           | 3                    |    | 28.95    | 5810-38800             | 12700 (10.0)              | 1541.4              |                                         | hrr15  |
|                    | <i>Amphidinium</i>           | NA                   | 16 | 16.69    | 92-19852               | 2434 (46.1)               | 326.7               |                                         | ol06   |
|                    | <i>Dinophysis</i>            | 5                    |    | 43.13    | 10700-54400            | 42000 (7.7)               | 4739.0              |                                         | hrr15  |

| Taxonomic level | name                     | Nspecies | n  | Mean ESD | V <sub>c</sub> min-max | Mean V <sub>c</sub> (CV%) | Mean C <sub>c</sub> | Comments | Source |
|-----------------|--------------------------|----------|----|----------|------------------------|---------------------------|---------------------|----------|--------|
|                 | <i>Diplopsalis</i>       | 1        |    | 40.35    | 10800-106000           | 34400 (24.0)              | 3929.0              |          | hrr15  |
|                 | <i>Gonyaulax</i>         | 5        |    | 32.27    | 8080-25900             | 17600 (4.2)               | 2094.1              |          | hrr15  |
|                 | <i>Gymnodinium</i>       | NA       | 35 | 29.14    | 72-177606              | 12958 (64.2)              | 1570.8              |          | ol06   |
|                 | <i>Gyrodinium</i>        | NA       | 30 | 35.10    | 72-177606              | 22637 (43.3)              | 2652.4              |          | ol06   |
|                 | <i>Heterocapsa</i>       | NA       | 18 | 11.45    | 103-4179               | 785 (40.7)                | 113.0               |          | ol06   |
|                 | <i>Katodinium</i>        | 1        |    | 17.19    | 416-18300              | 2660 (38.0)               | 355.2               |          | hrr15  |
|                 | <i>Mesoporos</i>         | 1        |    | 15.91    | 1150-3940              | 2110 (17.0)               | 285.7               |          | hrr15  |
|                 | <i>Oblea</i>             | 1        |    | 24.88    | 4190-14100             | 8060 (14.0)               | 1005.8              |          | hrr15  |
|                 | <i>Oxytoxum</i>          | 1        |    | 7.81     | 78-476                 | 249 (20.0)                | 38.4                |          | hrr15  |
|                 | <i>Polykrikos</i>        | 1        |    | 64.27    | 27300-293000           | 139000 (28.0)             | 14579.6             |          | hrr15  |
|                 | <i>Pronoctiluca</i>      | 1        |    | 19.29    | 905-10500              | 3760 (29.0)               | 491.5               |          | hrr15  |
|                 | <i>Prorocentrum</i>      | 5        |    | 13.37    | 905-9740               | 1250 (6.3)                | 174.8               |          | hrr15  |
|                 | <i>Protoperidinium</i>   | 17       |    | 51.38    | 11400-455000           | 71000 (17.0)              | 7758.6              |          | hrr15  |
|                 | <i>Scrippsiella</i>      | 1        |    | 20.83    | 690-16800              | 4730 (28.0)               | 609.7               |          | hrr15  |
|                 | <i>Tripos</i>            | 9        |    | 42.82    | 13700-70700            | 41100 (7.6)               | 4643.6              |          | hrr15  |
| <b>Class</b>    |                          |          |    |          |                        |                           |                     |          |        |
|                 | <b>Bacillariophyceae</b> | 114      |    | 35.08    | 27-5480000             | 22600 (107.0)             | 978.5               |          | hrr15  |
|                 | <b>Dinophyceae</b>       | 79       |    | 33.16    | 177-377000             | 19100 (50.0)              | 2261.2              |          | hrr15  |

Table S1b

| Taxonomic level | name                      | ESD or mean ESD | V <sub>c</sub> min-max | V <sub>c</sub> or mean V <sub>c</sub> | C <sub>c</sub> or mean C <sub>c</sub> | Comments (d, d1, d2 and h are dimensions in µm)                                                                      | Source                |
|-----------------|---------------------------|-----------------|------------------------|---------------------------------------|---------------------------------------|----------------------------------------------------------------------------------------------------------------------|-----------------------|
| Species         |                           |                 |                        |                                       |                                       |                                                                                                                      |                       |
|                 | Bacillariophyceae         |                 |                        |                                       |                                       |                                                                                                                      |                       |
|                 | <i>Mediopyxis helysia</i> | 54.18           |                        | 83252                                 | 2817.3                                | -Dimensions: 100 (d1), 20 (d2) and 53 (h)<br><br>-Geometric shape: oval cylinder                                     | Kühn et al. (2006)    |
|                 | Dinophyceae               |                 |                        |                                       |                                       |                                                                                                                      |                       |
|                 | <i>Azadinium caudata</i>  | 19.87           | 2422-6430              | 4106                                  | 533.9                                 | -Dimension ranges for Sottish waters: 18.9-25.8 (d) and 25.9-36.9 (h)<br><br>-Geometric shape: Cone with half sphere | Nézan et al. (2012)   |
| Genus           |                           |                 |                        |                                       |                                       |                                                                                                                      |                       |
|                 | Bacillariophyceae         |                 |                        |                                       |                                       |                                                                                                                      |                       |
|                 | <i>Lennoxia</i>           | 4.18            |                        | 38                                    | 5.5                                   | -Mean dimensions from Greenland and Danish waters: 1.5 (d) and 65 (h)<br><br>-Geometric shape: Double cone           | Thomsen et al. (1993) |
|                 | Dinophyceae               |                 |                        |                                       |                                       |                                                                                                                      |                       |
|                 | <i>Corythodinium</i>      | 42.50           | 8181-113097            | 40194                                 | 4547.4                                | -Dimension ranges (approximated): 25-60 (d) and 50-120 (h)<br><br>-Geometric shape: Cone with half sphere            | Gómez et al. (2016)   |

**Table S2.** Cell carbon content ( $C_c$ ; pg C cell<sup>-1</sup>) information for the different phytoplankton groups identified using a flow cytometer.

| Phytoplankton group                    | $C_c$ | Comments and Source                                                                                                                                                                                                                                                                                                               |
|----------------------------------------|-------|-----------------------------------------------------------------------------------------------------------------------------------------------------------------------------------------------------------------------------------------------------------------------------------------------------------------------------------|
| <i>Synechococcus</i> spp.              | 0.1   | Zubkov et al. (1998)                                                                                                                                                                                                                                                                                                              |
| Pico-eukaryotes (0.2–2 $\mu\text{m}$ ) | 1.5   | Zubkov et al. (1998)                                                                                                                                                                                                                                                                                                              |
| Nano-eukaryotes (2–10 $\mu\text{m}$ )  | 24.9  | Assuming an equivalent spherical diameter (ESD) of 6 $\mu\text{m}$ (Pan et al., 2007), we estimated a cell volume ( $V_c$ ) of 113 $\mu\text{m}^3$ . Then, we transformed $V_c$ into $C_c$ using a conversion factor of 0.22 pg C $\mu\text{m}^{-3}$ (Booth, 1988).                                                               |
| Coccolithophores                       | 16.3  | As <i>Emiliana huxleyi</i> is the dominant coccolithophore species in shelf areas of the North Sea (Charalampopoulou et al., 2011; Poulton et al., 2014), we transformed its mean $V_c$ of 100 $\mu\text{m}^3$ (Harrison et al., 2015) into $C_c$ following the conversion factor recommended by Menden-Deuer and Lessard (2000). |
| Cryptophytes                           | 23.7  | We transformed the mean $V_c$ of 149 $\mu\text{m}^3$ for the class Cryptophyceae (Harrison et al., 2015) into $C_c$ following the conversion factor recommended by Menden-Deuer and Lessard (2000).                                                                                                                               |
| <i>Phaeocystis</i> spp. single cells   | 13.5  | Rousseau et al. (1990)                                                                                                                                                                                                                                                                                                            |

145 **Table S3:** Results for different models to describe the effect of day of year ( $dy$ ) on C:Chl ratios based on information from years 2015 and  
150 2016 (see Supplementary Note 5 and [Figure S4a](#)). The categorical variable *group* has two levels, one corresponds to C biomass estimations  
for the whole phytoplankton community ( $C_{\text{phyto}}$ ) and the other only for large ( $> 10 \mu\text{m}$ ) diatoms and dinoflagellates ( $C_{\text{diatom+dinoflagellate} > 10 \mu\text{m}}$ ).  
All models include an intercept ( $a$ ) and an error term ( $\varepsilon$ ). Additionally, the generalized additive models (GAMs) can include the effect of  
predictors through 1D smooth function ( $f$ ) or an interaction term  $f(dy|group)$  to allow a different seasonality for each group. The smooth  
function ( $f$ ) corresponds to a cyclic cubic spline with maximum effective degrees of freedom (**edf**) set to 5, and optimal **edf** determined by  
maximum likelihood, ML (Wood, 2017). For each model, we show the Akaike Information Criterion (AIC) and its associated weight  
(Burnham and Anderson, 2002), and the proportion of variance explained ( $R^2$ ). In all cases, the overall model had a p-value  $< 0.001$ . The  
results for the model with the lowest AIC (model 2) are in bold.

| Model                                           | Model description                                                     | AIC            | AIC weight  | $R^2$        |
|-------------------------------------------------|-----------------------------------------------------------------------|----------------|-------------|--------------|
| (1) $C: Chla = a + f(dy) + \varepsilon$         | Effect of day of year                                                 | 1488.86        | 0.00        | 0.207        |
| (2) $C: Chla = a + group + f(dy) + \varepsilon$ | Effect of day of year and different<br>intercept for each group level | <b>1453.76</b> | <b>0.92</b> | <b>0.374</b> |
| (3) $C: Chla = a + f(dy group) + \varepsilon$   | Effect of different day of the year for each<br>group level           | 1458.72        | 0.08        | 0.374        |

- Baker, K. S. and Frouin, R.: Relation between photosynthetically available radiation and total insolation at the ocean surface under clear skies, *Limnol. Oceanogr.*, 32, 1370-1377, doi: 10.4319/lo.1987.32.6.1370, 1987.
- Behrenfeld, M. J. and Boss, E. S.: Student's tutorial on bloom hypotheses in the context of phytoplankton annual cycles, *Glob. Change Biol.*, 24, 55-77, doi: 10.1111/gcb.13858, 2018.
- 160 Bojanowski, J. S.: sirad: Functions for Calculating Daily Solar Radiation and Evapotranspiration. R package version 2.3-3, available at: <https://CRAN.R-project.org/package=sirad>, 2016.
- Bojanowski, J. S., Vrieling, A., and Skidmore, A. K.: Calibration of solar radiation models for Europe using Meteosat Second Generation and weather station data, *Agric. For. Meteorol.*, 176, 1-9, doi: 10.1016/j.agrformet.2013.03.005, 2013.
- 165 Booth, B. C.: Size classes and major taxonomic groups of phytoplankton at two locations in the subarctic pacific ocean in May and August, 1984, *Mar. Biol.*, 97, 275-286, doi: 10.1007/BF00391313, 1988.
- Bresnan, E., Cook, K., Hindson, J., Hughes, S., Lacaze, J.-P., Walsham, P., Webster, L., and Turrell, W. R.: The Scottish Coastal Observatory 1997-2013. Part 2 - Description of Scotland's Coastal Waters, *Scott. Mar. Freshw. Sci.*, 7, 1-278, doi: 10.7489/1881-1, 2016.
- Burnham, K. P. and Anderson, D. R.: Model selection and multimodel inference: a practical information-theoretic approach, Springer-Verlag, New York, 2002.
- 170 Carruthers, T. J. B., Longstaff, B. J., Dennison, W. C., Abal, E. G., and Aioi, K.: Chapter 19 - Measurement of light penetration in relation to seagrass, in: *Global Seagrass Research Methods*, edited by: Short, F. T., and Coles, R. G., Elsevier Science, Amsterdam, 369-392, doi: 10.1016/B978-044450891-1/50020-7, 2001.
- Charalampopoulou, A., Poulton, A. J., Tyrrell, T., and Lucas, M. I.: Irradiance and pH affect coccolithophore community composition on a transect between the North Sea and the Arctic Ocean, *Mar. Ecol. Prog. Ser.*, 431, 25-43, doi: 10.3354/meps09140, 2011.
- 175 Cloern, J. E., Grenz, C., and Videgar-Lucas, L.: An empirical model of the phytoplankton chlorophyll : carbon ratio-the conversion factor between productivity and growth rate, *Limnol. Oceanogr.*, 40, 1313-1321, doi: 10.4319/lo.1995.40.7.1313, 1995.
- Devlin, M. J., Barry, J., Mills, D. K., Gowen, R. J., Foden, J., Sivyer, D., and Tett, P.: Relationships between suspended particulate material, light attenuation and Secchi depth in UK marine waters, *Estuar. Coast. Shelf Sci.*, 79, 429-439, doi: 10.1016/j.ecss.2008.04.024, 2008.
- 180 Geider, R. J.: Light and Temperature Dependence of the Carbon to Chlorophyll a Ratio in Microalgae and Cyanobacteria: Implications for Physiology and Growth of Phytoplankton, *New Phytol.*, 106, 1-34, doi: 10.1111/j.1469-8137.1987.tb04788.x, 1987.
- Gómez, F., Wakeman, K. C., Yamaguchi, A., and Nozaki, H.: Molecular Phylogeny of the Marine Planktonic Dinoflagellate *Oxytoxum* and *Corythodinium* (Peridiniales, Dinophyceae), *Acta Protozool.*, 55, doi: 10.4467/16890027AP.16.026.6095, 2016.
- 185 Harrison, P. J., Zingone, A., Mickelson, M. J., Lehtinen, S., Ramaiah, N., Kraberg, A. C., Sun, J., McQuatters-Gollop, A., and Jakobsen, H. H.: Cell volumes of marine phytoplankton from globally distributed coastal data sets, *Estuar. Coast. Shelf Sci.*, 162, 130-142, doi: 10.1016/j.ecss.2015.05.026, 2015.
- Hastie, T. J. and Tibshirani, R. J.: Generalized additive models, *Stat. Sci.*, 1, 297-310, doi: 10.1214/ss/1177013604, 1986.
- Heath, M., Sabatino, A., Serpetti, N., McCaig, C., and O'Hara Murray, R.: Modelling the sensitivity of suspended sediment profiles to tidal current and wave conditions, *Ocean Coast. Manage.*, 147, 49-66, doi: 10.1016/j.ocecoaman.2016.10.018, 2017.
- 190 Hoppenrath, M.: A revised checklist of planktonic diatoms and dinoflagellates from Helgoland (North Sea, German Bight), *Helgol. Mar. Res.*, 58, 243-251, doi: 10.1007/s10152-004-0190-6, 2004.
- Jakobsen, H. H. and Markager, S.: Carbon-to-chlorophyll ratio for phytoplankton in temperate coastal waters: Seasonal patterns and relationship to nutrients, *Limnol. Oceanogr.*, 61, 1853-1868, doi: 10.1002/lno.10338, 2016.
- 195 Kühn, S. F., Klein, G., Halliger, H., Hargraves, P., and Medlin, L.: A new diatom, *Mediopyxis helysia* gen. nov. and sp. nov. (Mediophyceae) from the North Sea and the Gulf of Maine as determined from morphological and phylogenetic characteristics, *Nova Hedwig. Beih.*, 130, 307-324, 2006.
- Leblanc, K., Aristegui, J., Armand, L., Assmy, P., Beker, B., Bode, A., Breton, E., Cornet, V., Gibson, J., Gosselin, M. P., Kopczynska, E., Marshall, H., Peloquin, J., Piontkovski, S., Poulton, A. J., Quéguiner, B., Schiebel, R., Shipe, R., Stefels, J., van Leeuwe, M. A.,

- 200 Varela, M., Widdicombe, C., and Yallop, M.: A global diatom database – abundance, biovolume and biomass in the world ocean, *Earth Syst. Sci. Data*, 4, 149-165, doi: 10.5194/essd-4-149-2012, 2012.
- Legg, T.: Comparison of daily sunshine duration recorded by Campbell–Stokes and Kipp and Zonen sensors, *Weather*, 69, 264-267, doi: 10.1002/wea.2288, 2014.
- Menden-Deuer, S. and Lessard, E. J.: Carbon to volume relationships for dinoflagellates, diatoms, and other protist plankton, *Limnol. Oceanogr.*, 45, 569-579, doi: 10.4319/lo.2000.45.3.0569, 2000.
- 205 Met Office: Met Office Integrated Data Archive System (MIDAS) Land and Marine Surface Stations Data (1853-current), NCAS British Atmospheric Data Centre, 2021 [dataset], 2012.
- Nézan, E., Tillmann, U., Bilien, G. I., Boulben, S., Chêze, K., Zentz, F., Salas, R., and Chomérat, N.: Taxonomic revision of the dinoflagellate *Amphidoma caudata*: transfer to the genus *Azadinium* (Dinophyceae) and proposal of two varieties, based on morphological and molecular phylogenetic analyses, *J. Phycol.*, 48, 925-939, doi: 10.1111/j.1529-8817.2012.01159.x, 2012.
- 210 Olenina, I., Hajdu, S., Edler, L., Andersson, A., Wasmund, N., Göbel, J., Huttunen, M., Jaanus, A., Ledaine, I., Huseby, S., and Niemkiewicz, E.: Biovolumes and size-classes of phytoplankton in the Baltic Sea. *HELCOM, Balt. Sea Environ. Proc.*, 106, 1–144, 2006.
- Pan, L. A., Zhang, J., and Zhang, L. H.: Picophytoplankton, nanophytoplankton, heterotrophic bacteria and viruses in the Changjiang Estuary and adjacent coastal waters, *J. Plankton Res.*, 29, 187-197, doi: 10.1093/plankt/fbm006, 2007.
- 215 Poulton, A. J., Stinchcombe, M. C., Achterberg, E. P., Bakker, D. C. E., Dumousseaud, C., Lawson, H. E., Lee, G. A., Richier, S., Suggett, D. J., and Young, J. R.: Coccolithophores on the north-west European shelf: calcification rates and environmental controls, *Biogeosciences*, 11, 3919-3940, doi: 10.5194/bg-11-3919-2014, 2014.
- Rousseau, V., Mathot, S., and Lancelot, C.: Calculating carbon biomass of *Phaeocystis* sp. from microscopic observations, *Mar. Biol.*, 107, 305-314, doi: 10.1007/BF01319830, 1990.
- 220 Thieurmél, B. and Elmarhraoui, A.: suncalc: Compute Sun Position, Sunlight Phases, Moon Position and Lunar Phase. R package version 0.5.0, available at: <https://CRAN.R-project.org/package=suncalc>, 2019.
- Thomsen, H. A., Buck, K. R., Marino, D., Sarno, D., Hansen, L. E., Østergaard, J. B., and Krupp, J.: *Lennoxia faveolata* gen. et sp. nov. (Diatomophyceae) from South America, California, West Greenland and Denmark, *Phycologia*, 32, 278-283, doi: 10.2216/i0031-8884-32-4-278.1, 1993.
- Wood, S. N.: Generalized additive models: an introduction with R (2nd edition), Chapman and Hall/CRC, 2017.
- 225 Zubkov, M. V., Sleight, M. A., Tarran, G. A., Burkill, P. H., and Leakey, R. J. G.: Picoplanktonic community structure on an Atlantic transect from 50°N to 50°S, *Deep Sea Res. Part I Oceanogr. Res. Pap.*, 45, 1339-1355, doi: 10.1016/S0967-0637(98)00015-6, 1998.
